# Supplementary material for: Comparative Analyses of Glyphosate Alternative Weed Management Strategies on Plant Coverage, Soil and Soil Biota
Source: MDPI journal article supplement (doi:10.3390/su132011454), 2021-10-16
Supplement: s1 [file s1]

**Supplementary Table S1.** Number of bacterial colony forming units (CFU) per gram of soil and diversity of bacteria based on different phenotypes observed in clay soil from the Vermont South trial site treated with different weed management strategies – winter treatment. Samples were collected 4 weeks after treatment with the different strategies.

| Treatment         | Bacterial CFU ( $10^6$ ) | Bacteria diversity |
|-------------------|--------------------------|--------------------|
| Control           | $5.1 \pm 2.3$            | 11                 |
| Glyphosate        | $3.1 \pm 2.1$            | 6                  |
| Glufosinate       | $3.7 \pm 2.3$            | 8                  |
| Pine Oil          | $8.8 \pm 2.3$            | 12                 |
| Clove Oil         | $8.3 \pm 2.8$            | 13                 |
| Imazapyr          | $3.7 \pm 2.1$            | 4                  |
| Prodiamine        | $4.7 \pm 2.6$            | 5                  |
| MCPA + dicamba    | $6.3 \pm 2.8$            | 9                  |
| Acetic Acid + HCl | $12 \pm 5.8$             | 18                 |
| Steam             | $9.6 \pm 3.1$            | 7                  |
| Nonanoic acid     | $5.7 \pm 1.2$            | 9                  |

**Supplementary Table S2.** Number of bacterial colonies forming units (CFU) per gram of soil and diversity of bacteria based on different phenotypes observed in sandy loam soil from the Aspendale trial site treated with different weed management strategies– winter treatment. Samples were collected 4 weeks after treatment with the different strategies.

| Treatment                       | Bacterial CFU ( $10^6$ ) | Bacteria diversity |
|---------------------------------|--------------------------|--------------------|
| Control                         | $4.1 \pm 1.9$            | 7                  |
| Glyphosate                      | $2.1 \pm 1.6$            | 5                  |
| Glufosinate                     | $2.3 \pm 0.7$            | 5                  |
| Pine Oil                        | $2.1 \pm 1.3$            | 6                  |
| Clove Oil                       | $2.9 \pm 1.5$            | 5                  |
| Imazapyr                        | $1.7 \pm 1.0$            | 5                  |
| Prodiamine                      | $3.1 \pm 1.8$            | 6                  |
| MCPA + dicamba                  | $4.1 \pm 1.8$            | 7                  |
| Acetic acid + hydrochloric acid | $3.6 \pm 1.3$            | 5                  |
| Steam                           | $5.2 \pm 2.1$            | 7                  |
| Nonanoic acid                   | $2.7 \pm 1.9$            | 5                  |

**Supplementary Table S3.** Number of bacterial colonies forming units (CFU) per gram of soil and diversity of bacteria based on different phenotypes observed in clay soil from the Vermont South trial site treated with different weed management strategies – spring treatment. Samples were collected 4 weeks after treatment with the different strategies.

| Treatment         | Bacterial CFU ( $10^6$ ) | Bacteria diversity |
|-------------------|--------------------------|--------------------|
| Control           | $8.7 \pm 3.7$            | 8                  |
| Glyphosate        | $7.2 \pm 2.6$            | 6                  |
| Glufosinate       | $8.4 \pm 3.1$            | 10                 |
| Pine Oil          | $7.9 \pm 2.7$            | 8                  |
| Clove Oil         | $7.9 \pm 2.2$            | 11                 |
| Imazapyr          | $7.6 \pm 3.0$            | 7                  |
| Prodiamine        | $8.4 \pm 2.5$            | 9                  |
| MCPA + dicamba    | $6.8 \pm 2.7$            | 12                 |
| Acetic Acid + HCl | $7.9 \pm 2.9$            | 8                  |
| Steam             | $8.3 \pm 2.6$            | 8                  |
| Nonanoic acid     | $7.4 \pm 3.1$            | 10                 |

**Supplementary Table S4.** Number of bacterial colonies forming units (CFU) per gram of soil and diversity of bacteria based on different phenotypes observed in sandy loam soil from the Aspendale trial site treated with different weed management strategies – spring treatment. Samples were collected 4 weeks after treatment with the different strategies.

| Treatment                       | Bacterial CFU ( $10^6$ ) | Bacteria diversity |
|---------------------------------|--------------------------|--------------------|
| Control                         | $3.9 \pm 2.7$            | 6                  |
| Glyphosate                      | $4.1 \pm 2.3$            | 6                  |
| Glufosinate                     | $3.7 \pm 1.4$            | 6                  |
| Pine Oil                        | $3.2 \pm 1.8$            | 7                  |
| Clove Oil                       | $3.3 \pm 1.6$            | 6                  |
| Imazapyr                        | $3.7 \pm 2.1$            | 5                  |
| Prodiamine                      | $4.5 \pm 2.7$            | 6                  |
| MCPA + dicamba                  | $3.9 \pm 2.0$            | 6                  |
| Acetic acid + hydrochloric acid | $4.0 \pm 1.5$            | 6                  |
| Steam                           | $4.2 \pm 2.8$            | 6                  |
| Nonanoic acid                   | $3.9 \pm 2.6$            | 6                  |

**Supplementary Table S5.** Number of bacterial colony forming units (CFU) per gram of soil and diversity of bacteria based on different phenotypes observed in clay soil from the Vermont South trial site treated with different weed management strategies – summer treatment. Samples were collected 4 weeks after treatment with the different strategies.

| Treatment         | Bacterial CFU ( $10^7$ ) | Bacteria diversity |
|-------------------|--------------------------|--------------------|
| Control           | $8.2 \pm 2.8$            | 13                 |
| Glyphosate        | $8.8 \pm 1.9$            | 11                 |
| Glufosinate       | $7.6 \pm 2.3$            | 13                 |
| Pine Oil          | $7.2 \pm 2.7$            | 13                 |
| Clove Oil         | $6.9 \pm 3.1$            | 13                 |
| Imazapyr          | $7.6 \pm 2.8$            | 12                 |
| Prodiamine        | $7.0 \pm 2.5$            | 12                 |
| MCPA + dicamba    | $7.2 \pm 2.9$            | 12                 |
| Acetic Acid + HCl | $6.8 \pm 3.1$            | 11                 |
| Steam             | $7.5 \pm 2.8$            | 9                  |
| Nonanoic acid     | $8.3 \pm 2.8$            | 12                 |

**Supplementary Table S6.** Number of bacterial colonies forming units (CFU) per gram of soil and diversity of bacteria based on different phenotypes observed in sandy loam soil from the Aspendale trial site treated with different weed management strategies– summer treatment. Samples were collected 4 weeks after treatment with the different strategies.

| Treatment                          | Bacterial CFU ( $10^6$ ) | Bacteria diversity |
|------------------------------------|--------------------------|--------------------|
| Control                            | $5.3 \pm 2.0$            | 7                  |
| Glyphosate                         | $4.8 \pm 1.9$            | 8                  |
| Glufosinate                        | $3.8 \pm 1.6$            | 7                  |
| Pine Oil                           | $4.1 \pm 2.9$            | 8                  |
| Clove Oil                          | $5.8 \pm 3.1$            | 8                  |
| Imazapyr                           | $4.2 \pm 2.1$            | 8                  |
| Prodiamine                         | $6.1 \pm 3.0$            | 8                  |
| MCPA + dicamba                     | $6.0 \pm 2.7$            | 7                  |
| Acetic acid +<br>hydrochloric acid | $5.7 \pm 2.3$            | 8                  |
| Steam                              | $5.8 \pm 2.6$            | 8                  |
| Nonanoic acid                      | $6.2 \pm 2.3$            | 7                  |

**Supplementary Table S7.** Number of bacterial colonies forming units (CFU) per gram of soil and diversity of bacteria based on different phenotypes observed in clay soil from the Vermont South trial site treated with different weed management strategies – autumn treatment. Samples were collected 4 weeks after treatment with the different strategies.

| Treatment         | Bacterial CFU ( $10^7$ ) | Bacteria diversity |
|-------------------|--------------------------|--------------------|
| Control           | $8.3 \pm 3.2$            | 12                 |
| Glyphosate        | $8.5 \pm 3.0$            | 13                 |
| Glufosinate       | $8.0 \pm 2.9$            | 11                 |
| Pine Oil          | $8.3 \pm 2.8$            | 11                 |
| Clove Oil         | $9.2 \pm 2.8$            | 13                 |
| Imazapyr          | $8.1 \pm 3.1$            | 13                 |
| Prodiamine        | $7.9 \pm 2.9$            | 12                 |
| MCPA + dicamba    | $8.3 \pm 2.6$            | 12                 |
| Acetic Acid + HCl | $9.0 \pm 3.2$            | 13                 |
| Steam             | $8.7 \pm 2.9$            | 13                 |
| Nonanoic acid     | $8.7 \pm 2.8$            | 12                 |

**Supplementary Table S8.** Number of bacterial colonies forming units (CFU) per gram of soil and diversity of bacteria based on different phenotypes observed in sandy loam soil from the Aspendale trial site treated with different weed management strategies – autumn treatment. Samples were collected 4 weeks after treatment with the different strategies.

| Treatment                          | Bacterial CFU ( $10^6$ ) | Bacteria diversity |
|------------------------------------|--------------------------|--------------------|
| Control                            | $6.3 \pm 2.7$            | 9                  |
| Glyphosate                         | $5.3 \pm 2.3$            | 8                  |
| Glufosinate                        | $5.7 \pm 2.5$            | 9                  |
| Pine Oil                           | $6.0 \pm 2.6$            | 9                  |
| Clove Oil                          | $5.8 \pm 2.7$            | 8                  |
| Imazapyr                           | $4.9 \pm 2.0$            | 8                  |
| Prodiamine                         | $6.3 \pm 3.0$            | 7                  |
| MCPA + dicamba                     | $5.8 \pm 2.8$            | 8                  |
| Acetic acid +<br>hydrochloric acid | $5.9 \pm 2.5$            | 9                  |
| Steam                              | $6.2 \pm 2.8$            | 9                  |
| Nonanoic acid                      | $5.7 \pm 2.4$            | 9                  |

**Supplementary Table S9.** Cumulative effects of the different weed management strategies on soil physical and chemical properties at Vermont South

| Table11. Soil profiles for heavy clay soil at Vermont South |            |             |            |             |               |                |                                 |            |           |           |            |
|-------------------------------------------------------------|------------|-------------|------------|-------------|---------------|----------------|---------------------------------|------------|-----------|-----------|------------|
|                                                             | Control    | Glyphosate  | Pine oil   | Glufosinate | Nonanoic acid | MCPA + dicamba | Acetic acid + Hydrochloric acid | Prodiamine | Clove oil | Imazapyr  | Steam      |
| pH (1:5 Water)                                              | 6.1        | 5.2         | 5.7        | 5.5         | 5.8           | 6              | 6.2                             | 6.3        | 6.1       | 5.4       | 6.9        |
| pH (1:5 0.01M CaCl <sub>2</sub> )                           | 5.56       | 4.56        | 5.14       | 4.86        | 5.23          | 5.37           | 5.72                            | 5.7        | 5.48      | 4.79      | 6.35       |
| Electrical Conductivity (EC)                                | 91.4 µS/cm | 183.0 µS/cm | 96.0 µS/cm | 104 µS/cm   | 86.8 µS/cm    | 46.2 µS/cm     | 102 µS/cm                       | 73.8 µS/cm | 109 µS/cm | 207 µS/cm | 48 µS/cm   |
| Total Soluble Salt (TSS)                                    | 301.62 ppm | 603.9 ppm   | 316.8 ppm  | 343.2 ppm   | 286.44 ppm    | 152.46 ppm     | 336.6 ppm                       | 243.5 ppm  | 359.7 ppm | 683.1 ppm | 158.4 ppm  |
| Available Calcium (Ca)                                      | 2260 ppm   | 1560 ppm    | 1550 ppm   | 1336 ppm    | 1472 ppm      | 1142 ppm       | 1512 ppm                        | 1452 ppm   | 1576 ppm  | 1474 ppm  | 2320 ppm   |
| Available Magnesium (Mg)                                    | 525.6 ppm  | 460 ppm     | 488.4 ppm  | 373.2 ppm   | 415.2 ppm     | 336 ppm        | 450 ppm                         | 457.2 ppm  | 452.7 ppm | 404.4 ppm | 424.8 ppm  |
| Available Sodium (Na)                                       | 25.99 ppm  | 16.9 ppm    | 22.954 ppm | 10.764 ppm  | 16.86 ppm     | 12.052 ppm     | 17.73 ppm                       | 18.65 ppm  | 18.08 ppm | 15.04 ppm | 31.05 ppm  |
| Available Nitrogen (N)                                      | 6.77 ppm   | 70.7 ppm    | 7.92 ppm   | 27.7 ppm    | 8.59 ppm      | 1.7 ppm        | 7.58 ppm                        | 8.3 ppm    | 8.81 ppm  | 131 ppm   | 8.2 ppm    |
| Available Phosphorus (P)                                    | 17.0 ppm   | 42.8 ppm    | 24.7 ppm   | 35 ppm      | 24.3 ppm      | 17.6 ppm       | 28.4 ppm                        | 23.6 ppm   | 27.6 ppm  | 36.5 ppm  | 13.5 ppm   |
| Available Potassium (K)                                     | 530.4 ppm  | 499.2 ppm   | 522.6 ppm  | 464.1 ppm   | 600.6 ppm     | 365.43 ppm     | 577.2 ppm                       | 534.3 ppm  | 585 ppm   | 432.9 ppm | 289.38 ppm |
| Available Sulphur (S)                                       | 11.8 ppm   | 17.6 ppm    | 15.0 ppm   | 8.86 ppm    | 12 ppm        | 5.85 ppm       | 13.5 ppm                        | 11.9 ppm   | 18 ppm    | 20.4 ppm  | 4.11 ppm   |
| Available Copper (Cu)                                       | 8.52 ppm   | 7.89 ppm    | 30 ppm     | 16.6 ppm    | 13.5 ppm      | 9.1 ppm        | 7.33 ppm                        | 7.73 ppm   | 6.21 ppm  | 17.4 ppm  | 3.99 ppm   |
| Available Zinc (Zn)                                         | 45.6 ppm   | 47.1 ppm    | 37.6 ppm   | 36.4 ppm    | 76.9 ppm      | 33.6 ppm       | 43.1 ppm                        | 33.5 ppm   | 35.2 ppm  | 36.4 ppm  | 20.5 ppm   |
| Available Iron (Fe)                                         | 12 ppm     | 56.0 ppm    | 81 ppm     | 109 ppm     | 69 ppm        | 58 ppm         | 30 ppm                          | 39 ppm     | 26 ppm    | 34 ppm    | 8 ppm      |
| Available Manganese (Mn)                                    | 8 ppm      | 13 ppm      | 9 ppm      | 6 ppm       | 8 ppm         | 4 ppm          | 5 ppm                           | 5 ppm      | 6 ppm     | 6 ppm     | 8 ppm      |
| Available Cobalt (Co)                                       | 0.73 ppm   | 0.69 ppm    | 0.62 ppm   | 0.44 ppm    | 0.52 ppm      | 0.42 ppm       | 0.51 ppm                        | 0.39 ppm   | 0.51 ppm  | 0.46 ppm  | 3.02 ppm   |
| Available Molybdenum (Mo)                                   | 0.20 ppm   | 0.26 ppm    | 0.36 ppm   | 0.45 ppm    | 0.28 ppm      | 0.29 ppm       | 0.26 ppm                        | 0.28 ppm   | 0.29 ppm  | 0.29 ppm  | 0.17 ppm   |
| Available Boron                                             | 0.52 ppm   | 0.40 ppm    | 0.35 ppm   | 0.31 ppm    | 0.31 ppm      | 0.28 ppm       | 0.29 ppm                        | 0.37 ppm   | 0.35 ppm  | 0.44 ppm  | 0.24 ppm   |
| Total Organic Matter (OM)                                   | 17%        | 17%         | 13%        | 10%         | 13%           | 8%             | 13%                             | 13%        | 13%       | 12%       | 13%        |
| Total Organic Carbon (OC)                                   | 8.45%      | 8.50%       | 6.35%      | 5.20%       | 6.50%         | 3.99%          | 6.40%                           | 6.50%      | 6.25%     | 6.50%     | 6.45%      |
| Exchangeable Calcium (meq/100g of soil)                     | 10.9       | 7.18        | 7.39       | 6.31        | 7.05          | 5.54           | 7.14                            | 6.97       | 7.45      | 6.59      | 11.3       |
| Exchangeable Magnesium (meq/100g of soil)                   | 4.22       | 3.5         | 3.88       | 2.94        | 3.31          | 2.72           | 3.54                            | 3.66       | 3.74      | 3.01      | 3.45       |
| Exchangeable Sodium (meq/100g of soil)                      | 0.109      | 0.0675      | 0.0952     | 0.0442      | 0.0702        | 0.0508         | 0.0729                          | 0.0779     | 0.0743    | 0.0585    | 0.132      |
| Exchangeable Potassium (meq/100g of soil)                   | 1.31       | 1.18        | 1.28       | 1.12        | 1.47          | 0.909          | 1.4                             | 1.32       | 1.42      | 0.992     | 0.724      |
| Exchangeable Hydrogen (meq/100g of soil)                    | 9.88       | 12.3        | 9.43       | 9.64        | 10.1          | 7.28           | 7.51                            | 8          | 8.47      | 9.53      | 5.6        |
| Cation Exchange Capacity (CEC)                              | 26.4       | 24.2        | 22.1       | 20.1        | 22            | 16.5           | 19.7                            | 20         | 21.2      | 20.2      | 21.2       |
| Adjusted CEC                                                | 18         | 20          | 15.7       | 17.5        | 15.5          | 12.5           | 13.3                            | 13.5       | 14.9      | 17.1      | 15.6       |
| Exchangeable Sodium Percentage (ESP)                        | 0.41%      | 0.28%       | 0.43%      | 0.22%       | 0.32%         | 0.31%          | 0.37%                           | 0.39%      | 0.35%     | 2.90%     | 0.62%      |
| Calcium / Magnesium Ratio (Ca/Mg)                           | 2.58       | 2.05        | 1.9        | 2.15        | 2.13          | 2.04           | 2.02                            | 1.91       | 1.99      | 2.19      | 3.28       |
| Base Saturation Percentage (BSP)                            | 64%        | 51%         | 58%        | 53%         | 55%           | 57%            | 63%                             | 61%        | 61%       | 56%       | 74%        |

**Supplementary Table S10.** Cumulative effects of the different weed management strategies on soil physical and chemical properties at Aspendale

| Table 12. Soil profiles for sandy loam soil at Aspendale |            |            |            |             |               |                |                                 |            |            |            |            |
|----------------------------------------------------------|------------|------------|------------|-------------|---------------|----------------|---------------------------------|------------|------------|------------|------------|
|                                                          | Control    | Glyphosate | Pine oil   | Glufosinate | Nonanoic acid | MCPA + dicamba | Acetic acid + Hydrochloric acid | Prodiamine | Clove oil  | Imazapyr   | Steam      |
| pH (1:5 Water)                                           | 6.9        | 6.8        | 6.7        | 7.1         | 7             | 6.8            | 7                               | 6.9        | 6.8        | 6.7        | 6.7        |
| pH (1:5 0.01M CaCl <sub>2</sub> )                        | 6.36       | 6.33       | 6.23       | 6.64        | 6.5           | 6.32           | 6.45                            | 6.36       | 6.3        | 6.23       | 6.21       |
| Electrical Conductivity (EC)                             | 43.7 µS/cm | 48.3 µS/cm | 44.9 µS/cm | 49 µS/cm    | 51 µS/cm      | 40.8 µS/cm     | 43 ppm                          | 38.6 µS/cm | 35.2 µS/cm | 74.7 µS/cm | 51.3 µS/cm |
| Total Soluble Salt (TSS)                                 | 144.21 ppm | 159.39 ppm | 148.17 ppm | 161.7 ppm   | 168 ppm       | 134.64 ppm     | 141.9 µS/cm                     | 127.38 ppm | 116.16 ppm | 246.51 ppm | 169.29 ppm |
| Available Calcium (Ca)                                   | 1194 ppm   | 848 ppm    | 970 ppm    | 1080 ppm    | 816 ppm       | 802 ppm        | 1144 ppm                        | 1252 ppm   | 850 ppm    | 1496 ppm   | 1404 ppm   |
| Available Magnesium (Mg)                                 | 303.6 ppm  | 228 ppm    | 246 ppm    | 265.2 ppm   | 283.2 ppm     | 220.8 ppm      | 265.2 ppm                       | 266.4 ppm  | 235.2 ppm  | 318 ppm    | 349.2 ppm  |
| Available Sodium (Na)                                    | 61.41 ppm  | 53.59 ppm  | 58.42 ppm  | 51.29 ppm   | 62.56 ppm     | 38.18 ppm      | 40.25 ppm                       | 39.56 ppm  | 56.81 ppm  | 46.46 ppm  | 48.53 ppm  |
| Available Nitrogen (N)                                   | 2.1 ppm    | 8.6 ppm    | 5.51 ppm   | 7.32 ppm    | 5.4 ppm       | 5.24 ppm       | 5.7 ppm                         | 5.06 ppm   | 4 ppm      | 31 ppm     | 3.76 ppm   |
| Available Phosphorus (P)                                 | 5.97 ppm   | 5.97 ppm   | 3.55 ppm   | 3.39 ppm    | 2.47 ppm      | 5.11 ppm       | 5.43 ppm                        | 4.83 ppm   | 4.47 ppm   | 10.1 ppm   | 8.26 ppm   |
| Available Potassium (K)                                  | 85.8 ppm   | 62.01 ppm  | 60.84 ppm  | 56.94 ppm   | 75.27 ppm     | 48.75 ppm      | 53.04 ppm                       | 51.48 ppm  | 70.98 ppm  | 93.6 ppm   | 104.13 ppm |
| Available Sulphur (S)                                    | 6.66 ppm   | 3.94 ppm   | 4.92 ppm   | 5.56 ppm    | 6.1 ppm       | 5.11 ppm       | 4.9 ppm                         | 5.29 ppm   | 5.15 ppm   | 5.71 ppm   | 7.68 ppm   |
| Available Copper (Cu)                                    | 12 ppm     | 11.3 ppm   | 20 ppm     | 15.5 ppm    | 13.2 ppm      | 12.5 ppm       | 10.1 ppm                        | 11.2 ppm   | 8.27 ppm   | 11.1 ppm   | 11.9 ppm   |
| Available Zinc (Zn)                                      | 39 ppm     | 48.6 ppm   | 62.1 ppm   | 52.4 ppm    | 45.2 ppm      | 58.7 ppm       | 63.2 ppm                        | 81.8 ppm   | 48.3 ppm   | 54.7 ppm   | 41 ppm     |
| Available Iron (Fe)                                      | 12 ppm     | 9 ppm      | 11 ppm     | 7 ppm       | 6 ppm         | 7 ppm          | 14 ppm                          | 9 ppm      | 10 ppm     | 10 ppm     | 15 ppm     |
| Available Manganese (Mn)                                 | 3 ppm      | 7 ppm      | 6 ppm      | 7 ppm       | 4 ppm         | 5 ppm          | 4 ppm                           | 3 ppm      | 3 ppm      | 7 ppm      | 7 ppm      |
| Available Cobalt (Co)                                    | 0.49 ppm   | 0.44 ppm   | 0.66 ppm   | 0.44 ppm    | 0.44 ppm      | 0.48 ppm       | 0.41 ppm                        | 0.42 ppm   | 0.37 ppm   | 0.51 ppm   | 0.47 ppm   |
| Available Molybdenum (Mo)                                | 0.09 ppm   | 0.16 ppm   | 0.17 ppm   | 0.17 ppm    | 0.12 ppm      | 0.18 ppm       | 0.12 ppm                        | 0.10 ppm   | 0.08 ppm   | 0.11 ppm   | 0.15 ppm   |
| Available Boron                                          | 0.25 ppm   | 0.29 ppm   | 0.27 ppm   | 0.26 ppm    | 0.28 ppm      | 0.23 ppm       | 0.29 ppm                        | 0.24 ppm   | 0.23 ppm   | 0.34 ppm   | 0.43 ppm   |
| Total Organic Matter (OM)                                | 6%         | 5%         | 5%         | 4%          | 5%            | 4%             | 4%                              | 6%         | 4%         | 5%         | 4%         |
| Total Organic Carbon (OC)                                | 2.77%      | 2.26%      | 2.43%      | 2.18%       | 2.25%         | 1.95%          | 2.25%                           | 2.87%      | 2.13%      | 2.49%      | 2.23%      |
| Exchangeable Calcium (meq/100g of soil)                  | 5.73       | 3.97       | 4.6        | 5.09        | 3.82          | 3.78           | 5.45                            | 6.02       | 4.06       | 6.99       | 6.71       |
| Exchangeable Magnesium (meq/100g of soil)                | 2.43       | 1.78       | 1.94       | 2.08        | 2.21          | 1.74           | 2.1                             | 2.14       | 1.87       | 2.48       | 2.78       |
| Exchangeable Sodium (meq/100g of soil)                   | 0.256      | 0.218      | 0.241      | 0.21        | 0.254         | 0.157          | 0.167                           | 0.165      | 0.236      | 0.189      | 0.202      |
| Exchangeable Potassium (meq/100g of soil)                | 0.211      | 0.149      | 0.148      | 0.138       | 0.181         | 0.118          | 0.13                            | 0.127      | 0.174      | 0.224      | 0.255      |
| Exchangeable Hydrogen (meq/100g of soil)                 | 2.76       | 1.85       | 2.11       | 1.49        | 1.8           | 1.82           | 1.7                             | 2.33       | 1.88       | 2.08       | 2.29       |
| Cation Exchange Capacity (CEC)                           | 11.4       | 7.97       | 9.04       | 9.01        | 8.26          | 7.62           | 9.55                            | 10.8       | 8.22       | 12         | 12.2       |
| Adjusted CEC                                             | 8.63       | 6.12       | 6.93       | 7.52        | 6.46          | 5.8            | 7.85                            | 8.45       | 6.34       | 9.88       | 10         |
| Exchangeable Sodium Percentage (ESP)                     | 2.25%      | 2.74%      | 2.67%      | 2.33%       | 3.07%         | 2.06%          | 1.75%                           | 1.53%      | 2.87%      | 1.58%      | 1.65%      |
| Calcium / Magnesium Ratio (Ca/Mg)                        | 2.36       | 2.23       | 2.37       | 2.44        | 1.73          | 2.18           | 2.59                            | 2.82       | 2.17       | 2.82       | 2.41       |
| Base Saturation Percentage (BSP)                         | 77%        | 78%        | 78%        | 84%         | 79%           | 77%            | 83%                             | 79%        | 78%        | 84%        | 82%        |
