# Supplementary material for: Comparative Analyses of Glyphosate Alternative Weed Management Strategies on Plant Coverage, Soil and Soil Biota
Source: MDPI journal article supplement (doi:10.3390/su132011454), 2021-10-16
Supplement: s1 [file s1]

Archive with 1 entries (1 files):
- sustainability-1373747-supplementary.pdf
